# Supplementary material
Source: PubMed Central journal article supplement (PMC6348141)

Fig. S1

A

Melanoma

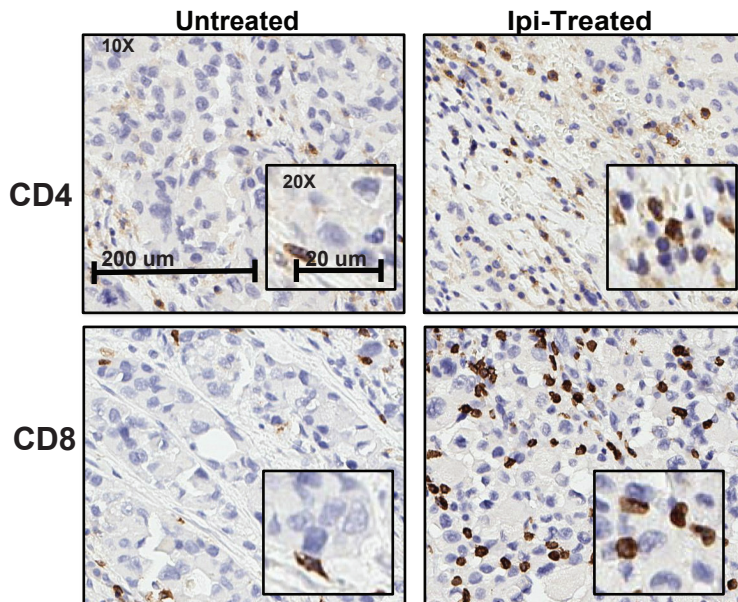

B

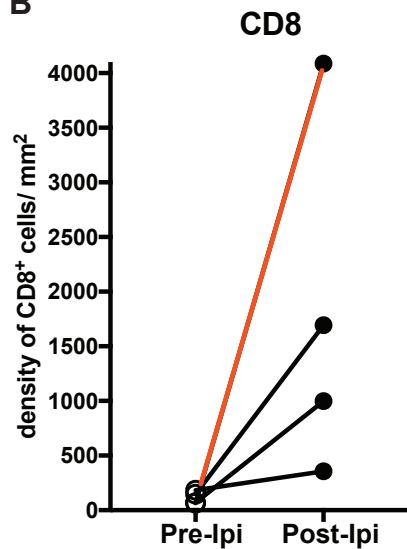

C

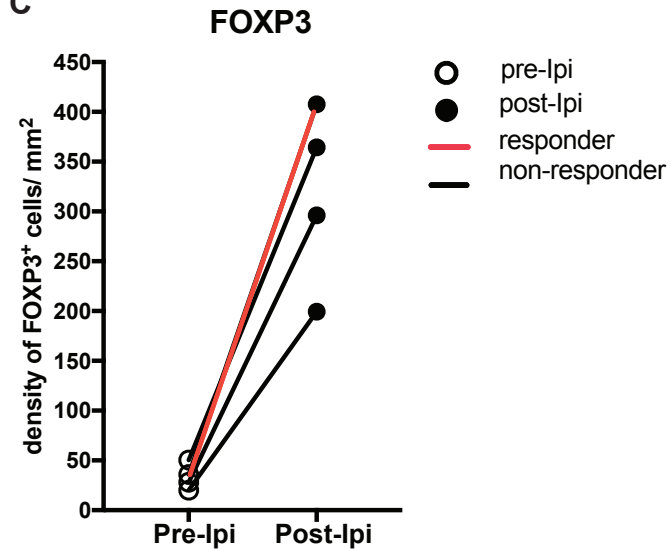

Supplement: NIHMS1501957-supplement-2.pdf [file NIHMS1501957-supplement-2.pdf]

Fig. S2

A

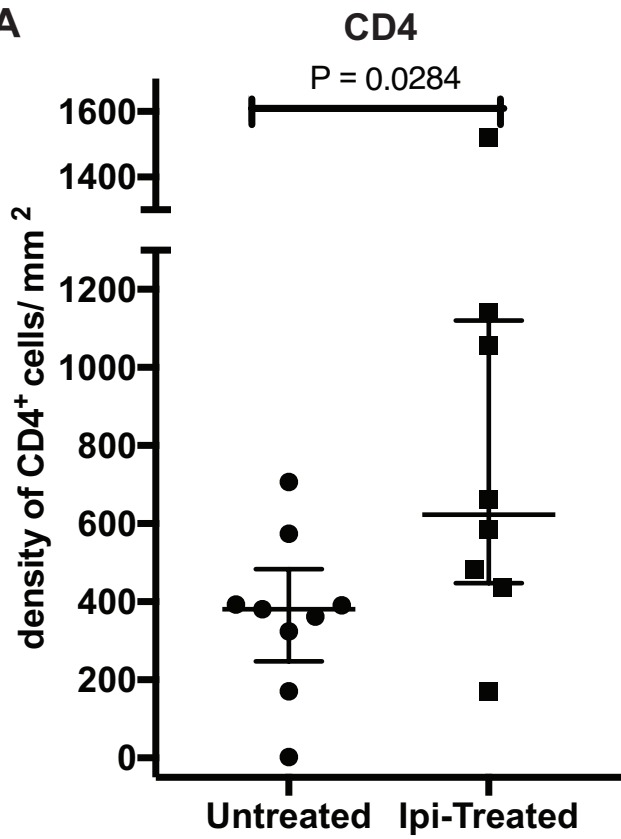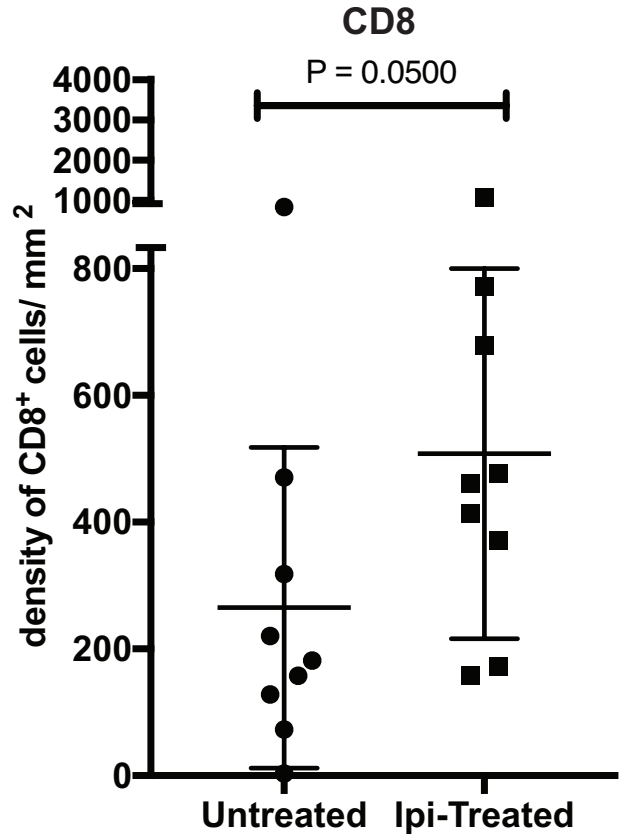

B

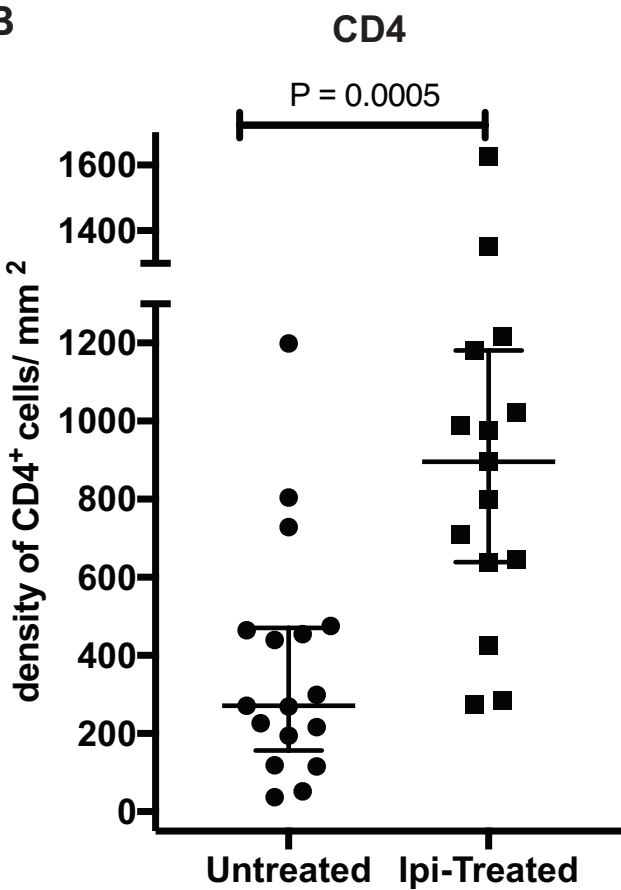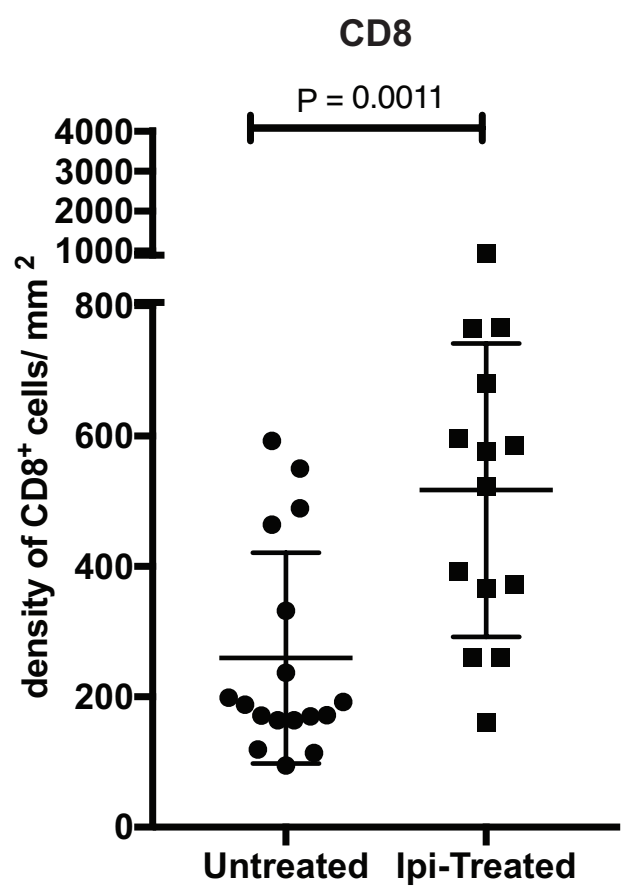

Supplement: NIHMS1501957-supplement-3.pdf [file NIHMS1501957-supplement-3.pdf]

Fig. S3

FOXP3

Untreated

Ipi-Treated

Melanoma

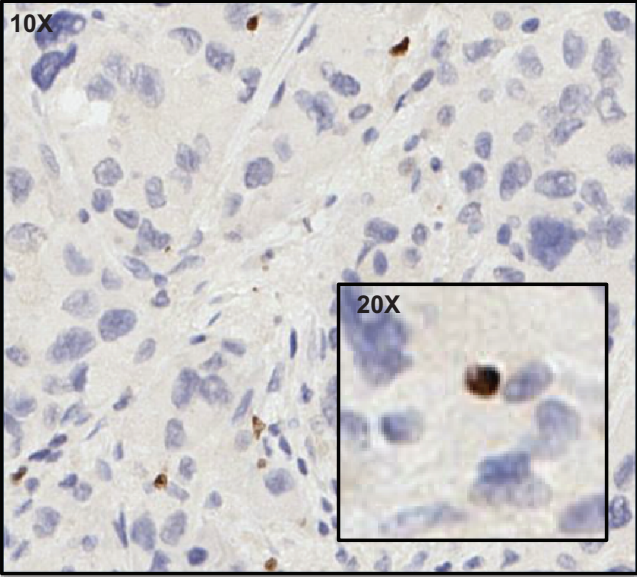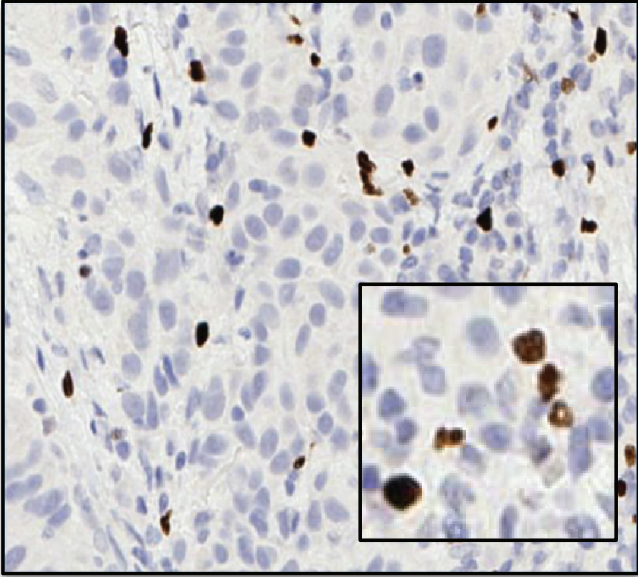

Bladder cancer

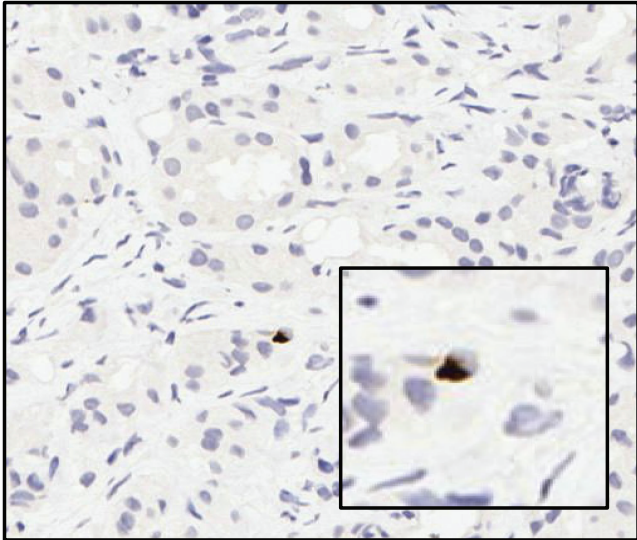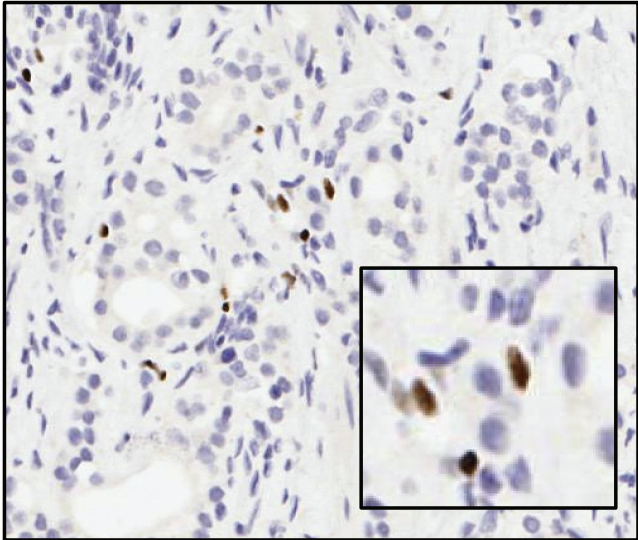

Prostate cancer

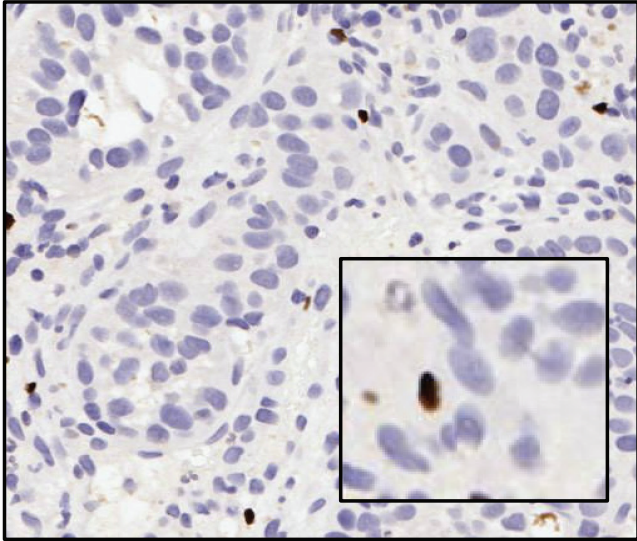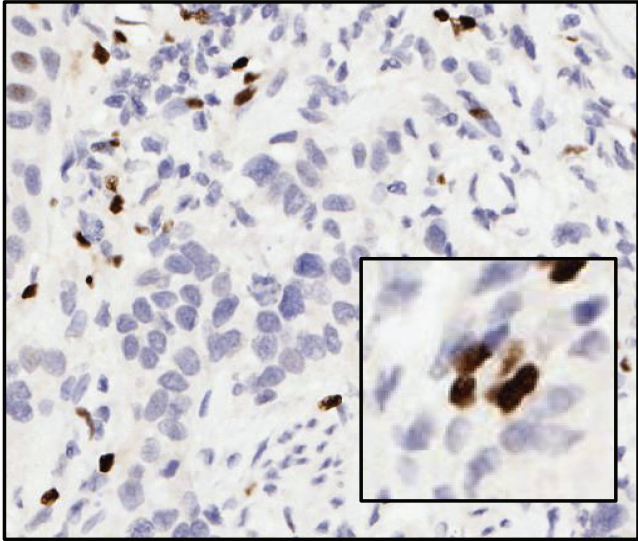

Supplement: NIHMS1501957-supplement-4.pdf [file NIHMS1501957-supplement-4.pdf]

**Fig. S4****A**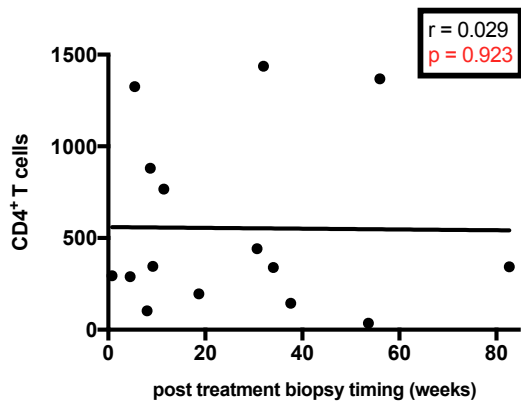**Ipilimumab cohort - Melanoma**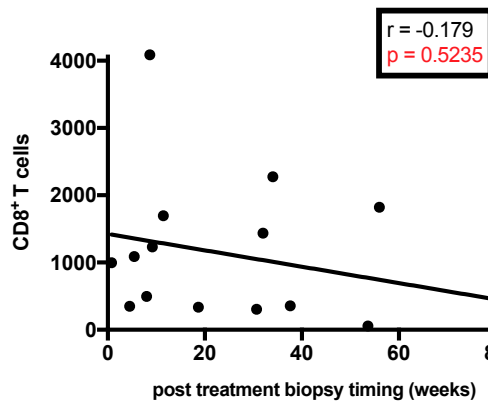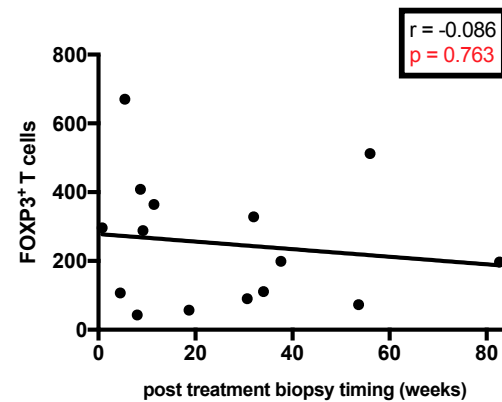**Tremelimumab cohort - Melanoma****B**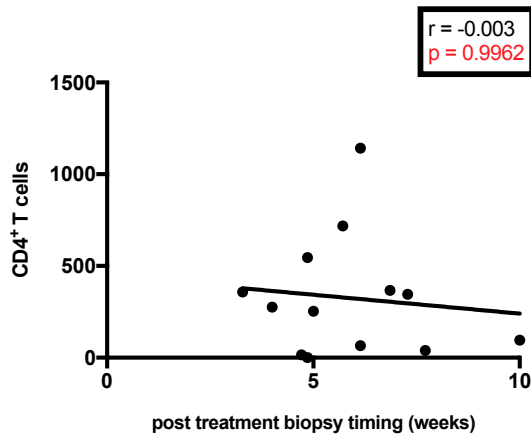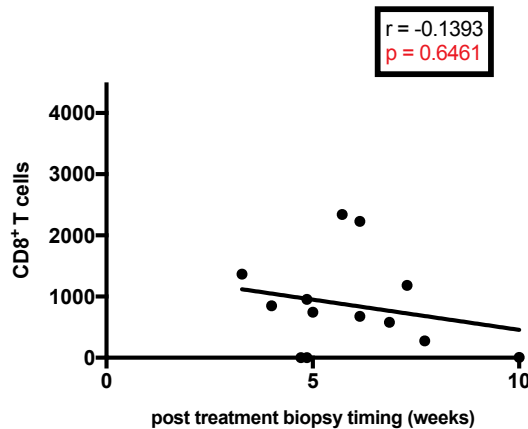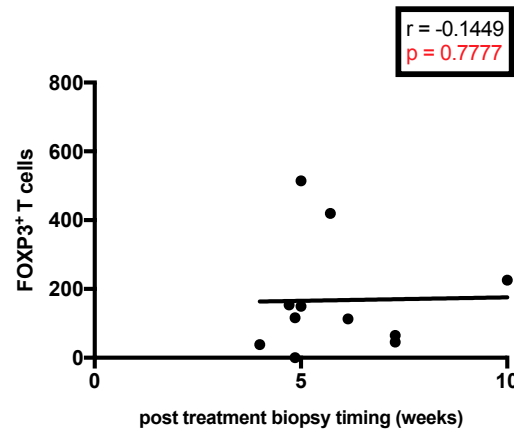

Supplement: NIHMS1501957-supplement-5.pdf [file NIHMS1501957-supplement-5.pdf]

**Figure S5****Melanoma**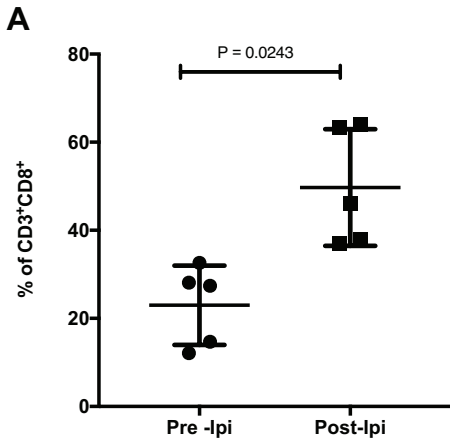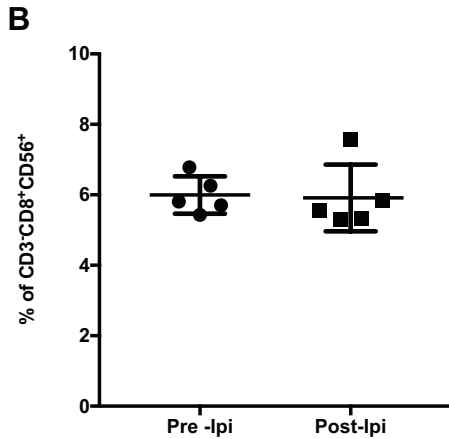

Supplement: NIHMS1501957-supplement-6.pdf [file NIHMS1501957-supplement-6.pdf]

Figure S6

Melanoma

**A**

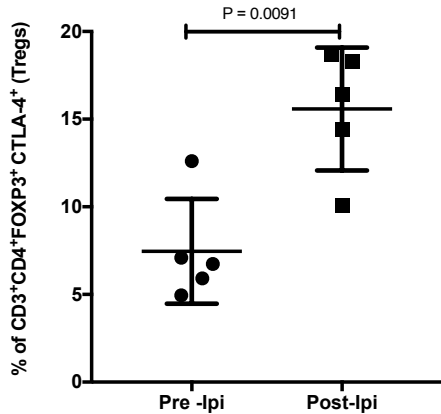

**B**

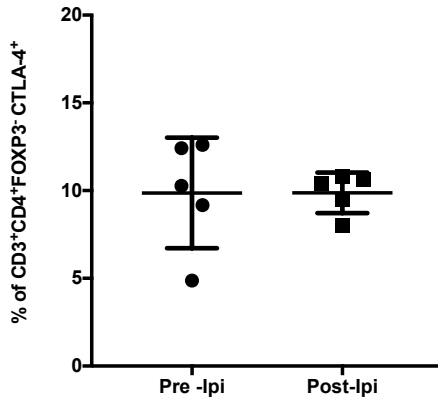

**C**

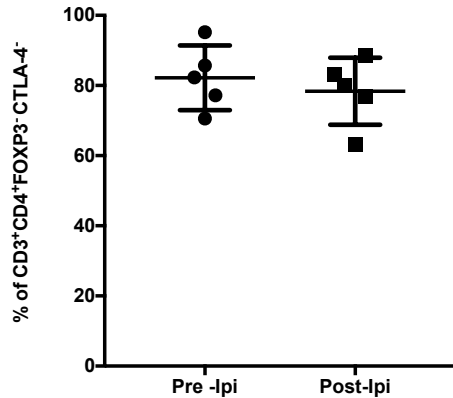

Supplement: NIHMS1501957-supplement-7.pdf [file NIHMS1501957-supplement-7.pdf]
